# Supplementary material
Source: Springer Nature journal article supplement (https://www.springermedizin.de/resource/supplementary/12883_2008_233_MOESM2_ESM.pdf/9457142)
Supplement: MOESM2 [file 9457142]

### Monofocal

### MRI findings at month 3

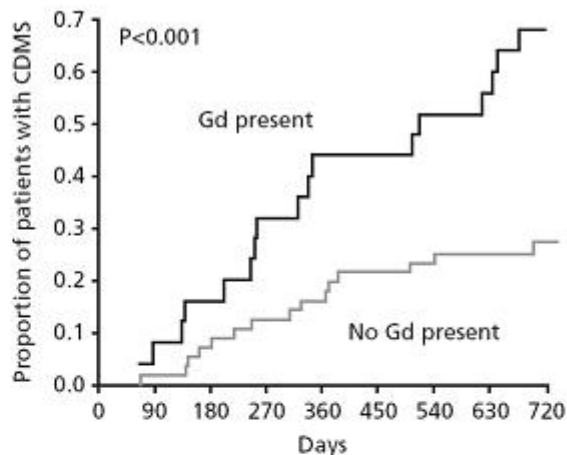

|                        |    |    |    |    |   |
|------------------------|----|----|----|----|---|
| at risk: no Gd present | 56 | 52 | 47 | 41 | 8 |
| at risk: Gd present    | 25 | 21 | 14 | 12 | 0 |

### Multifocal

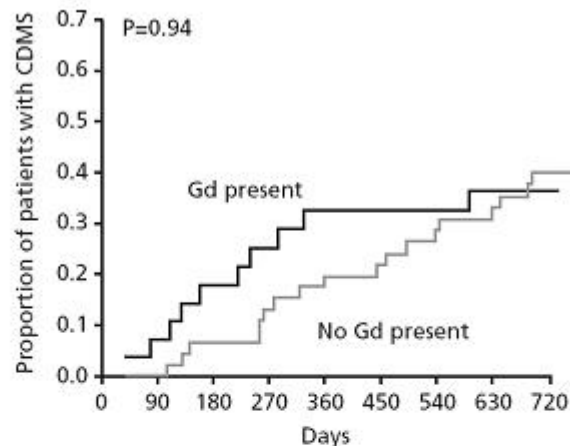

|                        |    |    |    |    |   |
|------------------------|----|----|----|----|---|
| at risk: no Gd present | 46 | 43 | 36 | 31 | 8 |
| at risk: Gd present    | 28 | 23 | 18 | 18 | 8 |

### MRI findings at month 6

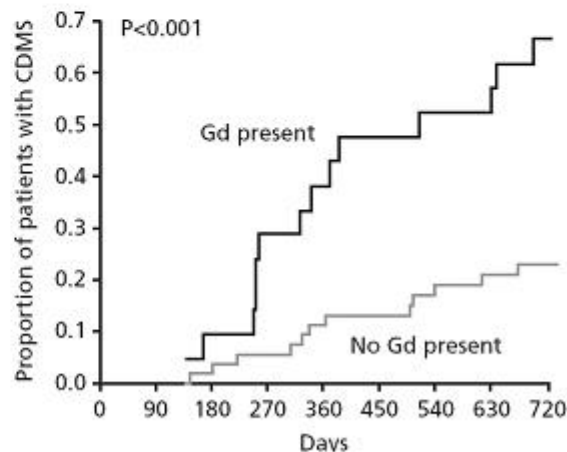

|                        |    |    |    |    |   |
|------------------------|----|----|----|----|---|
| at risk: no Gd present | 53 | 52 | 47 | 41 | 7 |
| at risk: Gd present    | 21 | 19 | 13 | 10 | 1 |

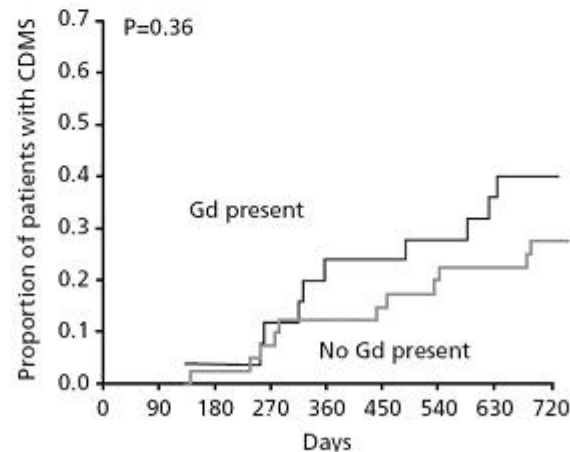

|                        |    |    |    |    |   |
|------------------------|----|----|----|----|---|
| at risk: no Gd present | 40 | 39 | 35 | 31 | 9 |
| at risk: Gd present    | 26 | 25 | 19 | 18 | 8 |
